# Supplementary material for: A sustainable approach to hierarchically porous carbons from tannic acid and their utilization in supercapacitive energy storage systems
Source: Royal Society of Chemistry journal article supplement (doi:10.1039/c9ta01712g), 2019-01-01
Supplement: c9ta01712g1.pdf [file c9ta01712g1.pdf]

## Supporting Information

# A sustainable approach to hierarchically porous carbons from tannic acid and their utilization in supercapacitive energy storage

Noel Díez, Guillermo A. Ferrero, Marta Sevilla, Antonio B. Fuentres\*

*Instituto Nacional del Carbón (CSIC), Fco. Pintado Fe 26, Oviedo 33011, Spain*

\*Corresponding author: abefu@incar.csic.es

**Table S1.** Chemical composition of the hierarchically porous carbons.

| Sample code | Elemental composition (wt.%) |     |     |     |     | (O/C) <sub>at</sub> <sup>a</sup> |
|-------------|------------------------------|-----|-----|-----|-----|----------------------------------|
|             | C                            | H   | N   | S   | O   |                                  |
| CK-750      | 90.9                         | 0.2 | 0.1 | 0.0 | 8.9 | 0.07                             |
| CK-800      | 93.2                         | 0.2 | 0.1 | 0.0 | 6.5 | 0.05                             |
| CK-850      | 93.8                         | 0.1 | 0.2 | 0.0 | 6.1 | 0.05                             |
| CK-900      | 93.5                         | 0.1 | 0.3 | 0.0 | 6.2 | 0.05                             |

<sup>a</sup> O/C atomic ratio.

**Table S2.** Textural properties and yield of tannic acid-derived carbons produced by a variety of conditions.

| Sample code | Activating agent/template (wt. ratio) <sup>a</sup>                      | Textural properties                                |                                                       |                                                         | Yield <sup>b</sup> (%) |
|-------------|-------------------------------------------------------------------------|----------------------------------------------------|-------------------------------------------------------|---------------------------------------------------------|------------------------|
|             |                                                                         | S <sub>BET</sub> (m <sup>2</sup> g <sup>-1</sup> ) | V <sub>Total</sub> (cm <sup>3</sup> g <sup>-1</sup> ) | V <sub>&lt;2nm</sub> (cm <sup>3</sup> g <sup>-1</sup> ) |                        |
| TK          | -/KCl (0/6.7)                                                           | 510                                                | 0.48                                                  | 0.16                                                    | 26.1                   |
| CK          | K <sub>2</sub> CO <sub>3</sub> /- (1/0)                                 | 1770                                               | 0.86                                                  | 0.64                                                    | 35.2                   |
| BK          | KHCO <sub>3</sub> /KCl (1/6.7)                                          | 2180                                               | 0.91                                                  | 0.82                                                    | 36.3                   |
| OK          | K <sub>2</sub> C <sub>2</sub> O <sub>4</sub> /KCl (1/6.7)               | 1990                                               | 0.84                                                  | 0.72                                                    | 38.7                   |
| CK-N        | K <sub>2</sub> CO <sub>3</sub> /NaCl (1/6.7)                            | 1890                                               | 0.91                                                  | 0.69                                                    | 35.0                   |
| CK-C        | K <sub>2</sub> CO <sub>3</sub> /Na <sub>2</sub> CO <sub>3</sub> (1/6.7) | 1830                                               | 0.95                                                  | 0.68                                                    | 32.4                   |
| CK-F        | K <sub>2</sub> CO <sub>3</sub> /KCl (1/6.7)                             | 2340                                               | 0.98                                                  | 0.86                                                    | 36.1                   |
| CK-M        | K <sub>2</sub> CO <sub>3</sub> /KCl (1/6.7)                             | 2130                                               | 0.87                                                  | 0.78                                                    | 35.2                   |

<sup>a</sup> Weight ratio with respect to 1 part of tannic acid.

<sup>b</sup> Yield calculated by dividing the weight of porous carbon by the weight of tannic acid in the mixture prior to pyrolysis.

**Table S3.** Textural properties and carbon yield of porous carbons obtained by using different biomass-based carbon precursors and activating agents.

| Carbon precursor  | Activating agent                 | Textural properties                             |                                                    | Carbon yield <sup>a</sup> (%) | Reference   |
|-------------------|----------------------------------|-------------------------------------------------|----------------------------------------------------|-------------------------------|-------------|
|                   |                                  | $S_{\text{BET}}$ ( $\text{m}^2 \text{g}^{-1}$ ) | $V_{\text{Total}}$ ( $\text{cm}^3 \text{g}^{-1}$ ) |                               |             |
| Tannic acid       | $\text{K}_2\text{CO}_3$          | 2740                                            | 1.39                                               | 32.1                          | [This work] |
| Lignin            | $\text{K}_2\text{CO}_3$          | 1950                                            | 0.93                                               | 39.0                          | [37]        |
| Waste tea         | $\text{K}_2\text{CO}_3$          | 1722                                            | 0.95                                               | 15.9                          | [40]        |
| Coconut shell     | $\text{K}_2\text{CO}_3$          | 1430                                            | 0.65                                               | 48.0                          | [41]        |
| Chickpea husk     | $\text{K}_2\text{CO}_3$          | 1780                                            | 0.65                                               | 13.0                          | [42]        |
| Palm shell        | $\text{K}_2\text{CO}_3$          | 1170                                            | -                                                  | 19.0                          | [43]        |
| Rice husks        | $\text{K}_2\text{CO}_3$          | 1165                                            | 0.78                                               | 14.2                          | [44]        |
| Tobacco stems     | $\text{K}_2\text{CO}_3$          | 2557                                            | 1.65                                               | 16.7                          | [45]        |
| Tannin-F hydrogel | KOH                              | 1800                                            | 0.65                                               | 21.0                          | [31]        |
| Sugar cane pulp   | KOH                              | 2910                                            | 2.05                                               | 11.0                          | [7]         |
| Lignite           | KOH                              | 2810                                            | 1.35                                               | 9.7                           | [6]         |
| Gulfweed          | KOH                              | 2862                                            | 1.62                                               | 31.4                          | [5]         |
| Glucose           | $\text{KNO}_3$                   | 1912                                            | 0.93                                               | 9.1                           | [46]        |
| Glucosamine       | $\text{K}_2\text{C}_2\text{O}_4$ | 2680                                            | 1.49                                               | 11                            | [47]        |
| soya flour        | $\text{K}_2\text{C}_2\text{O}_4$ | 2924                                            | 2.15                                               | 5.0                           | [47]        |
| Sodium Glutamate  | none                             | 1010                                            | 0.56                                               | 33.0                          | [22]        |

<sup>a</sup> Yield calculated by dividing the weight of porous carbon by the weight of biomass-based precursor.

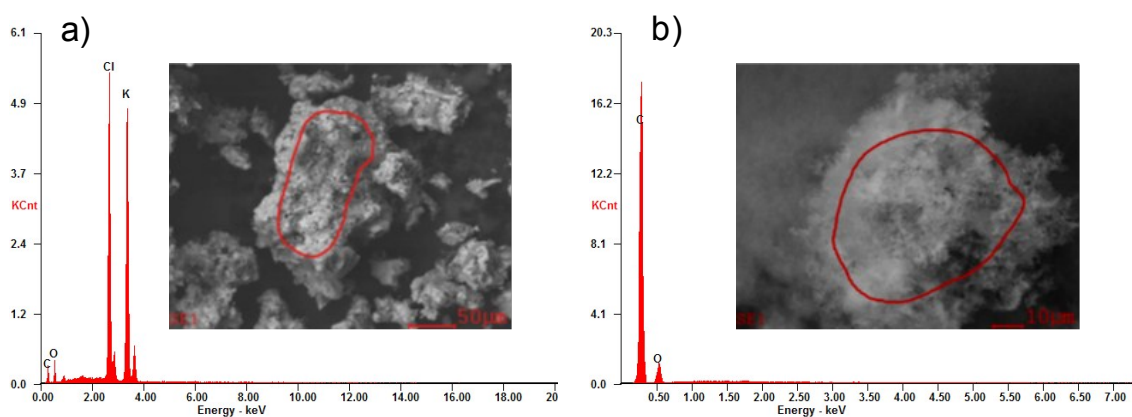

**Figure S1.** EDX analysis of a carbonized product (a) before and (b) after washing.

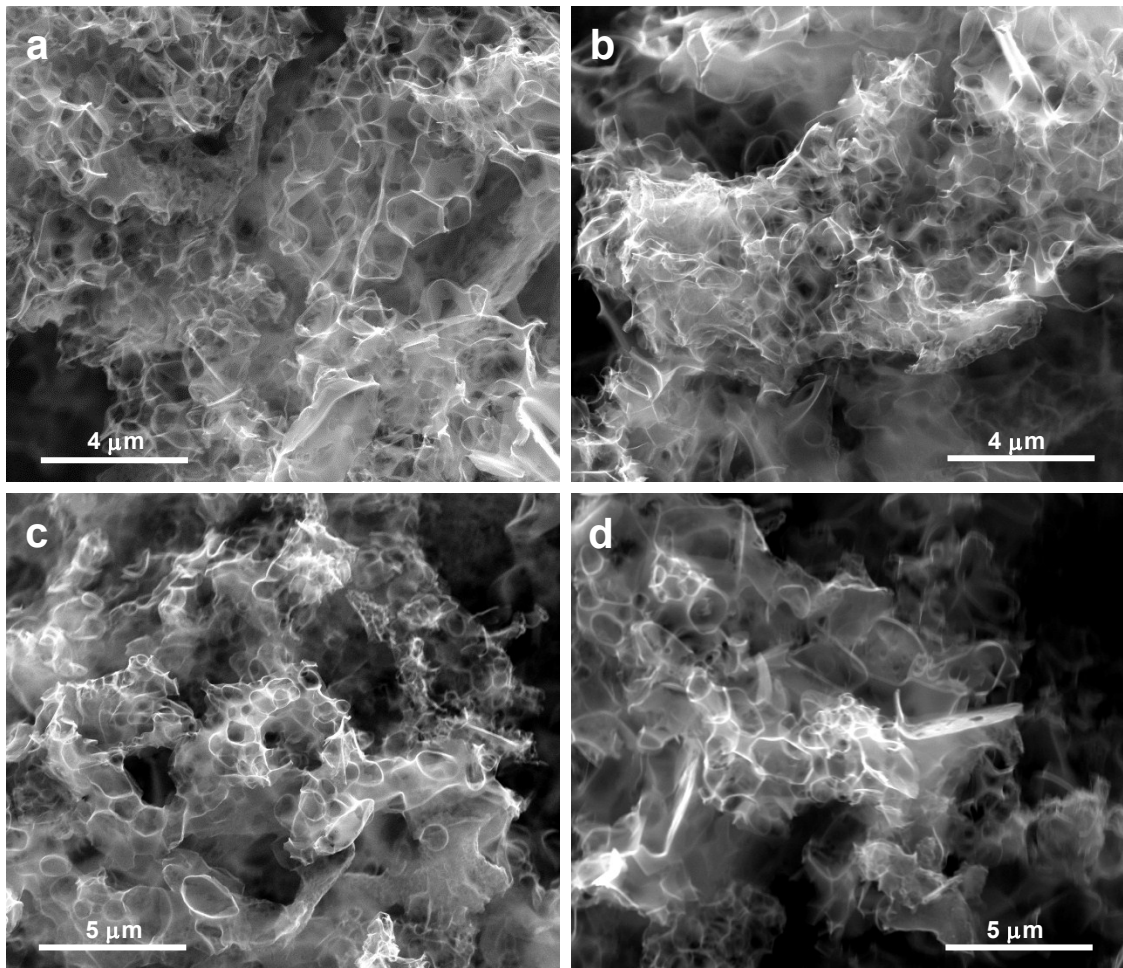

**Figure S2.** SEM images of CK-750 (a), CK-800 (b), CK-850 (c) and CK-900 (d).

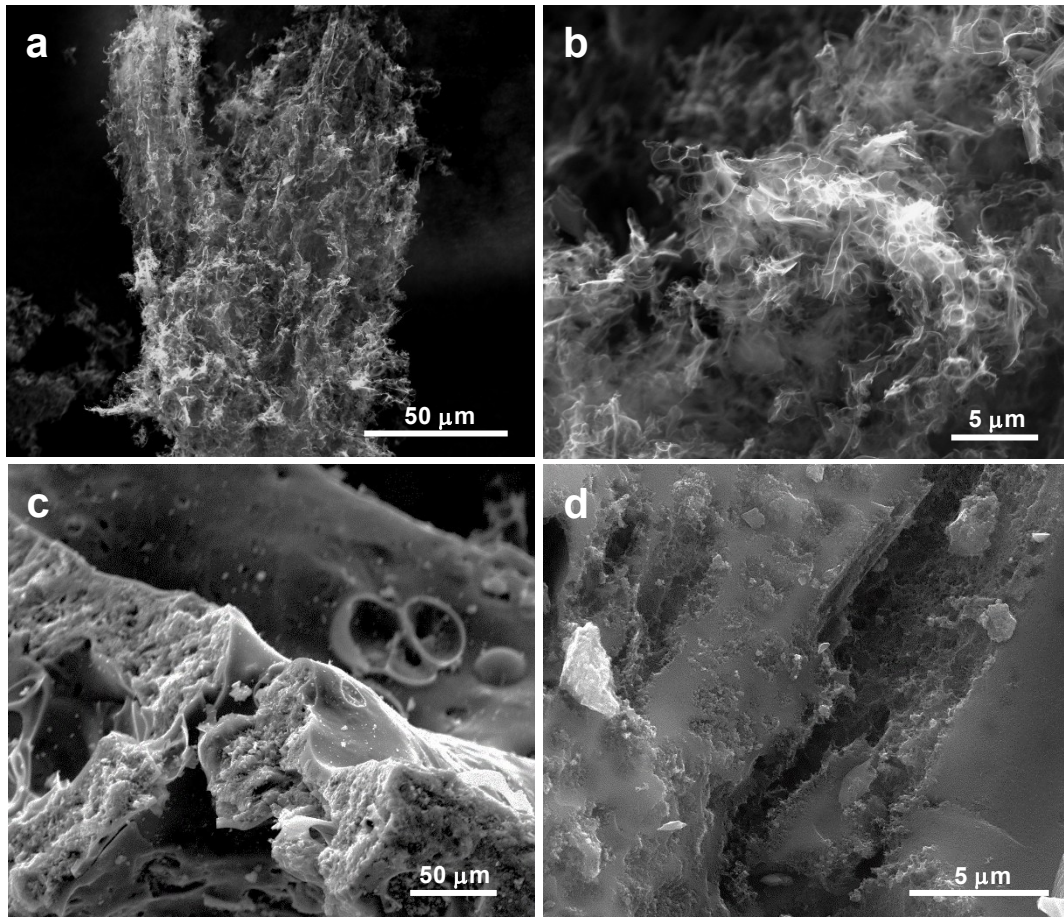

**Figure S3.** SEM images of sample TK prepared in the absence of  $K_2CO_3$  (a and b) and CK carbon obtained in the absence of KCl (c and d).

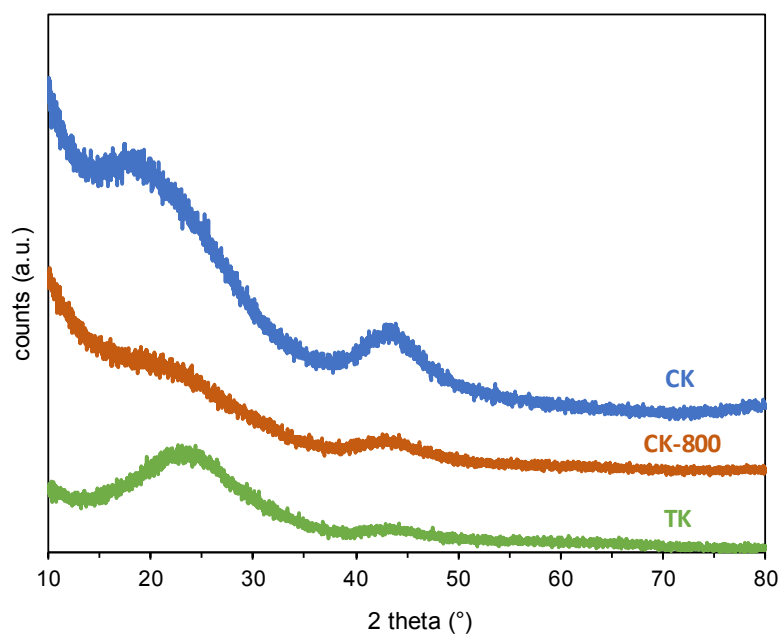

**Figure S4.** XRD patterns of carbons prepared from tannic acid and KCl (TK), tannic acid and  $K_2CO_3$  (CK) and the ternary mixture (CK-800) using the same carbonization temperature (800 °C).

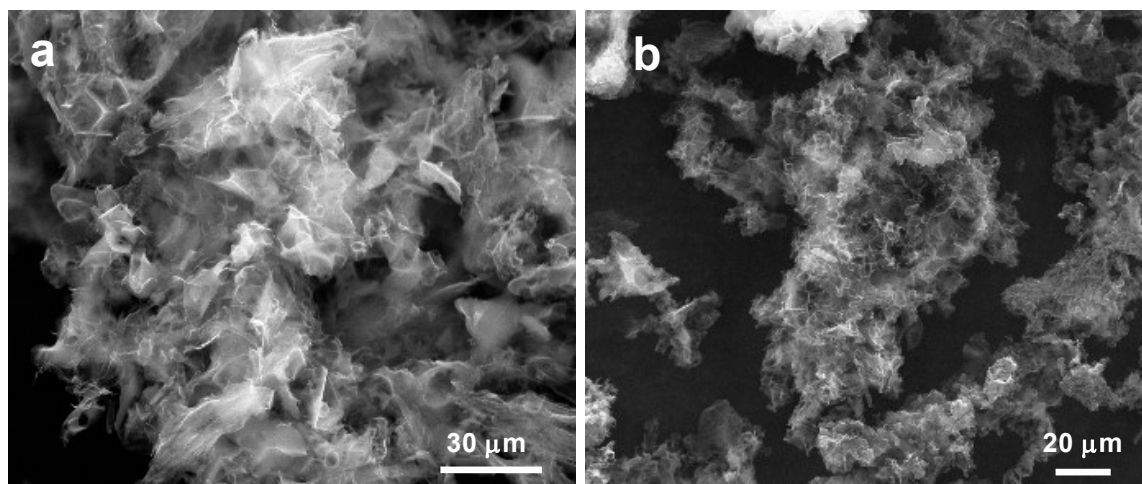

**Figure S5.** SEM images of BK (a) and OK (b) carbons.

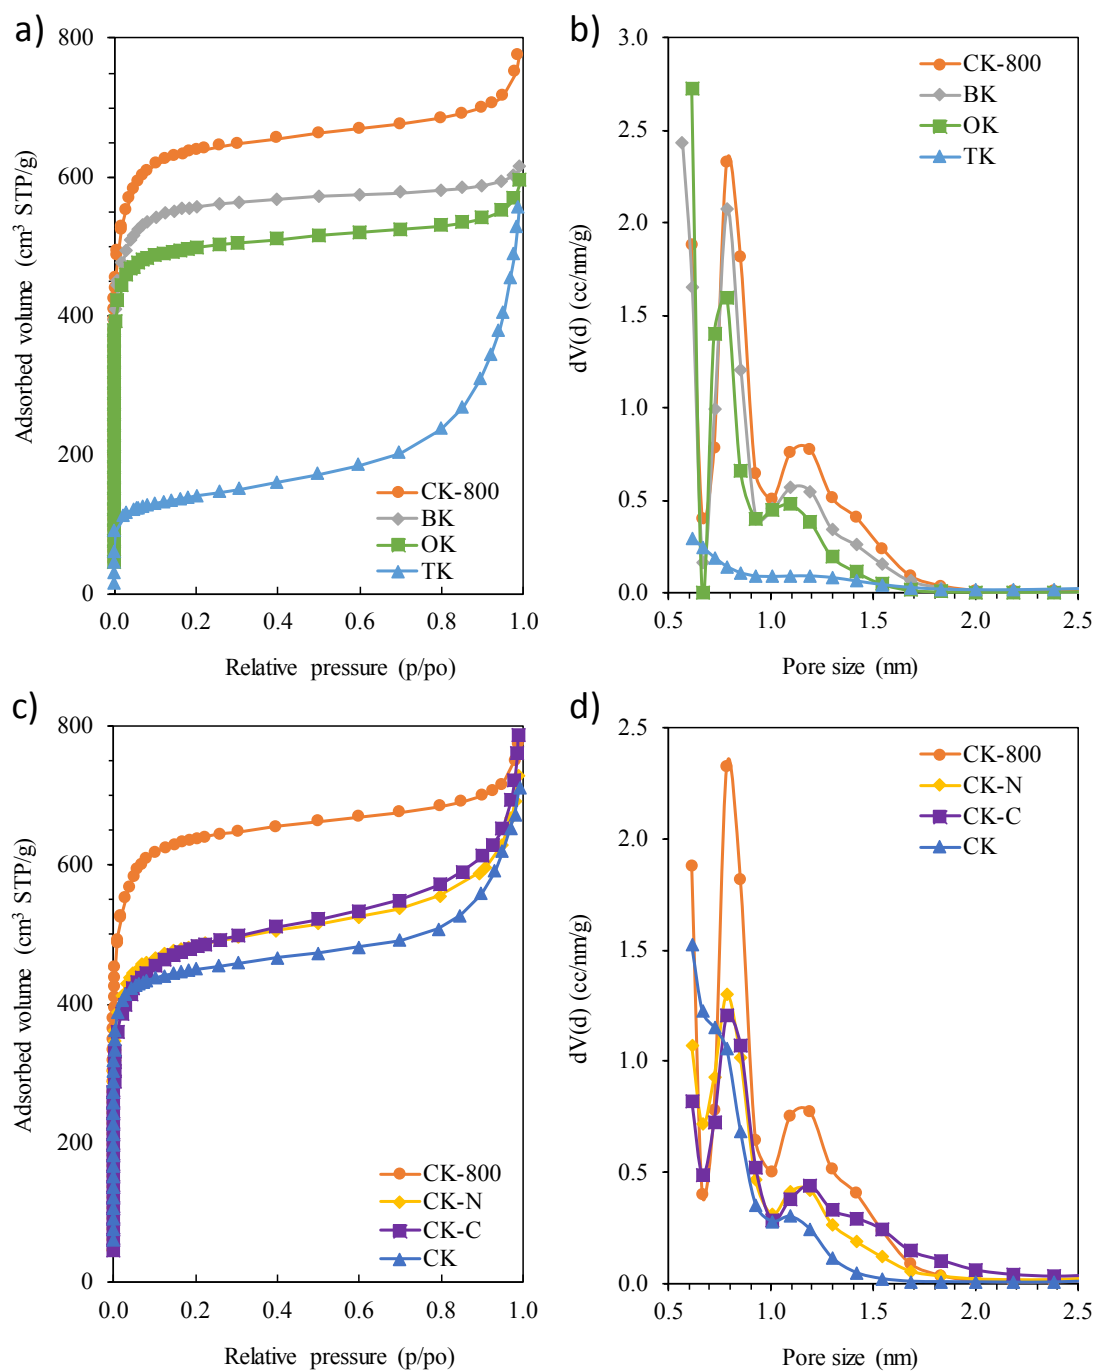

**Figure S6.** N<sub>2</sub> adsorption isotherms (a) and pore size distributions (b) of carbons prepared at 800 °C using K<sub>2</sub>CO<sub>3</sub>, KHCO<sub>3</sub>, K<sub>2</sub>C<sub>2</sub>O<sub>4</sub> and no activating agent. N<sub>2</sub> adsorption isotherms (c) and pore size distributions (d) of carbons prepared at 800 °C using K<sub>2</sub>CO<sub>3</sub>, Na<sub>2</sub>CO<sub>3</sub>, NaCl and no salt template.



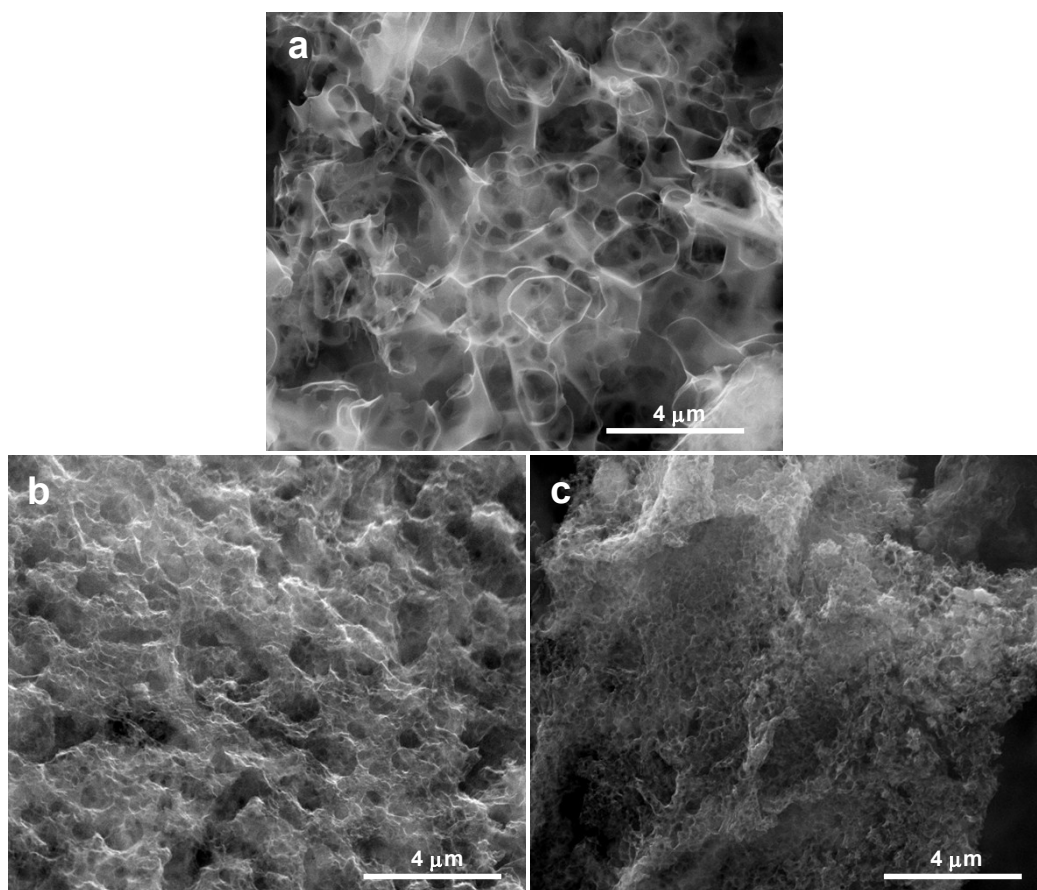

**Figure S7.** SEM images of CK-800 (a), CK-C (b) and CK-N (c) carbons.

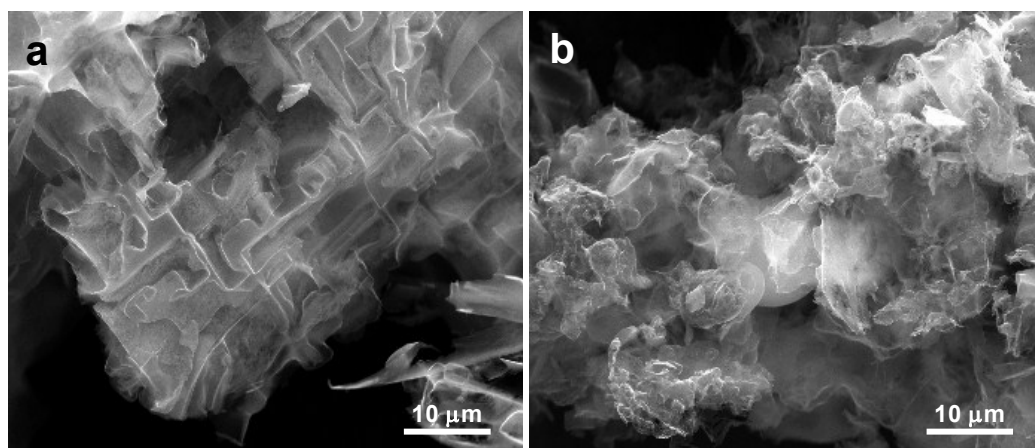

**Figure S8.** SEM images of CK-F (a) and CK-M (b) carbons.

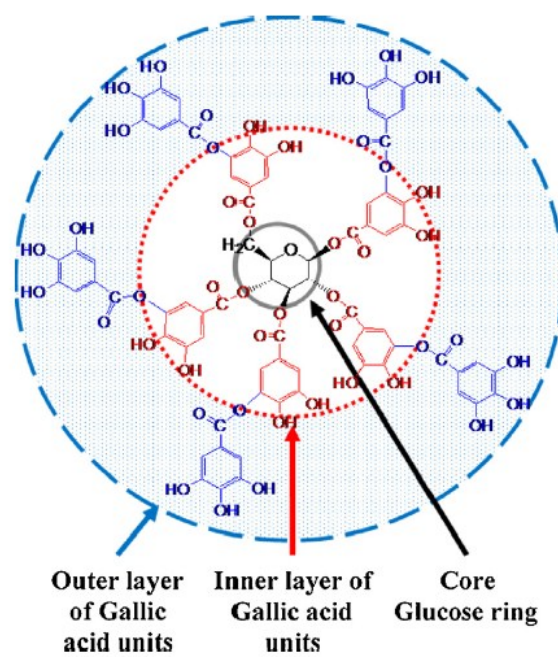

**Figure S9.** Chemical structure of tannic acid. Figure reproduced with permission.<sup>1</sup>

Copyright, Elsevier, 2015.



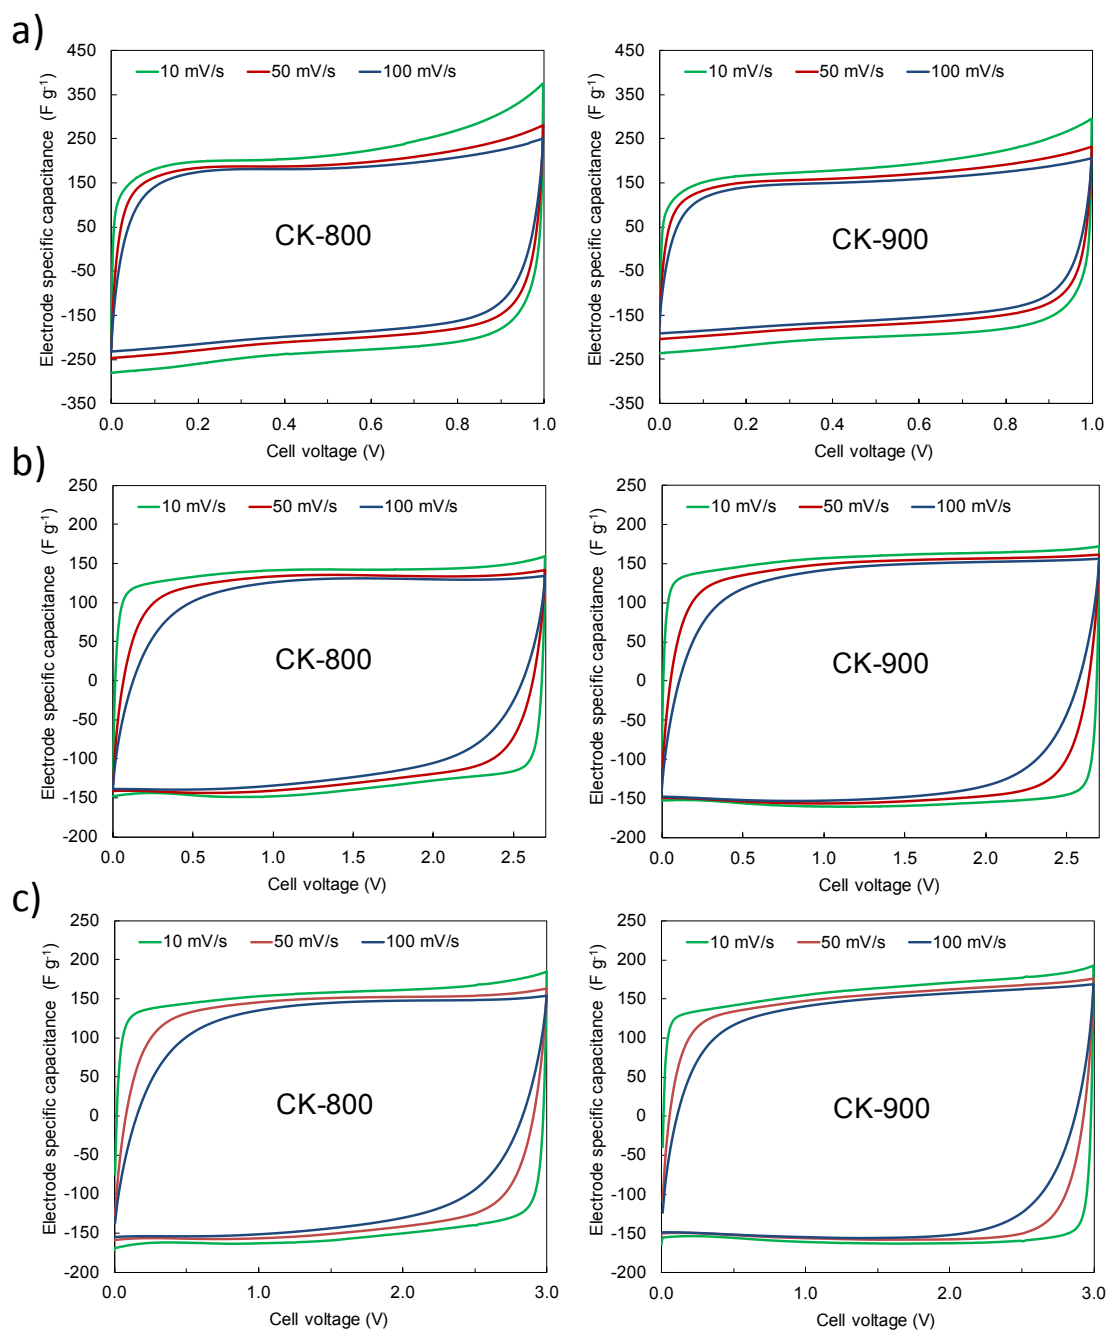

**Figure S10.** Cyclic voltammograms at different scan rates of the porous carbons in (a) 1M  $H_2SO_4$ , (b) 1 M  $TEABF_4$  and (c) EMImTFSI/AN.

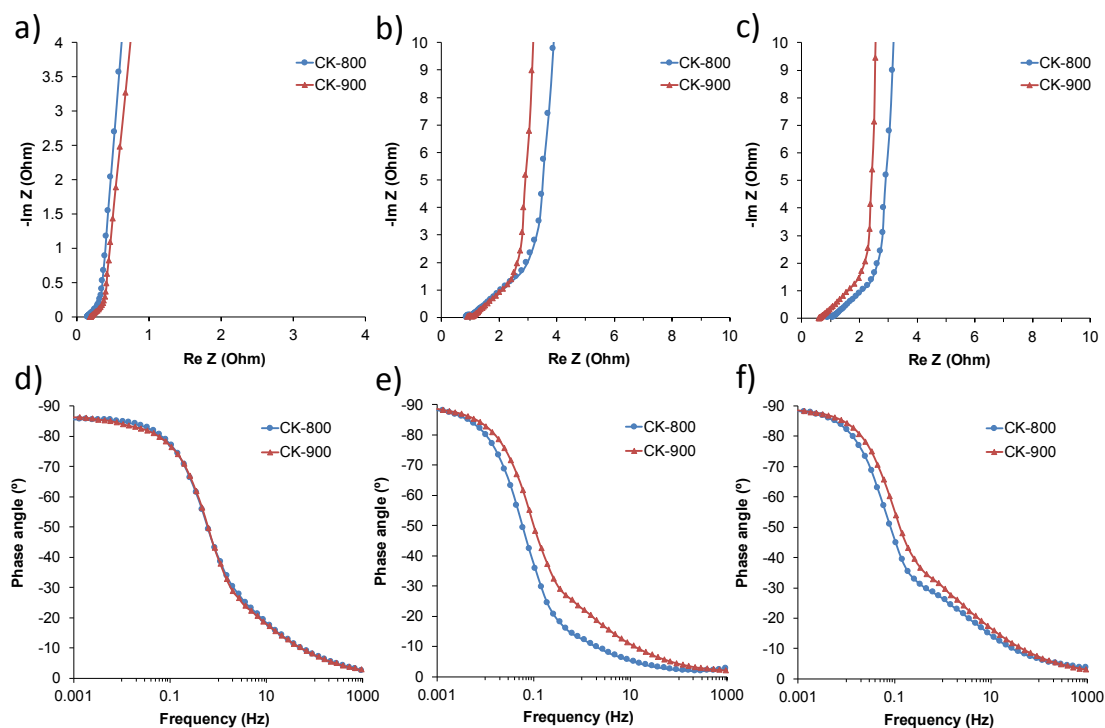

**Figure S11.** Nyquist plots (above) and Bode plots (below) for the porous carbons in 1 M  $\text{H}_2\text{SO}_4$  (a and d), 1 M  $\text{TEABF}_4$  (b and e) and EMIMTFSI/AN (c and f).

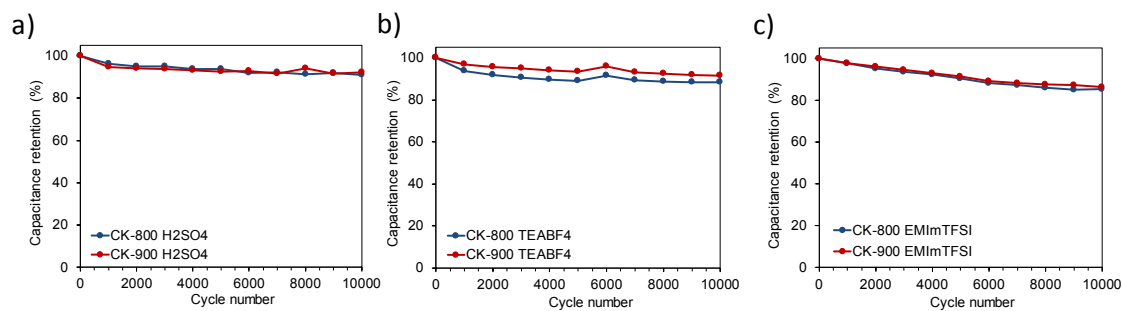

**Figure S12.** Cycling stability of the electrodes in (a) 1 M  $\text{H}_2\text{SO}_4$ , (b) 1 M  $\text{TEABF}_4$  and (c) EMIMTFSI/AN.

1. Z. Xia, A. Singh, W. Kiratitanavit, R. Mosurkal, J. Kumar and R. Nagarajan, *Thermochim. Acta*, 2015, **605**, 77-85.
